# Supplementary material
Source: publisher figshare collection journal article supplement (https://acs.figshare.com/ndownloader/files/3758266)
Supplement: Supplementary file 1 [file 3758266]

 
data_compound1
 
_audit_creation_method            SHELXL-97 
_chemical_name_systematic 
; 
 ? 
; 
_chemical_name_common             ? 
_chemical_melting_point           ? 
_chemical_formula_moiety          'C48 H24 Cu2 N8 O56 P W12'  
_chemical_formula_sum 
 'C48 H24 Cu2 N8 O56 P W12' 
_chemical_formula_weight          3973.00 
 
loop_ 
 _atom_type_symbol 
 _atom_type_description 
 _atom_type_scat_dispersion_real 
 _atom_type_scat_dispersion_imag 
 _atom_type_scat_source 
 'C'  'C'   0.0033   0.0016 
 'International Tables Vol C Tables 4.2.6.8 and 6.1.1.4' 
 'H'  'H'   0.0000   0.0000 
 'International Tables Vol C Tables 4.2.6.8 and 6.1.1.4' 
 'Cu'  'Cu'   0.3201   1.2651 
 'International Tables Vol C Tables 4.2.6.8 and 6.1.1.4' 
 'N'  'N'   0.0061   0.0033 
 'International Tables Vol C Tables 4.2.6.8 and 6.1.1.4' 
 'O'  'O'   0.0106   0.0060 
 'International Tables Vol C Tables 4.2.6.8 and 6.1.1.4' 
 'P'  'P'   0.1023   0.0942 
 'International Tables Vol C Tables 4.2.6.8 and 6.1.1.4' 
 'W'  'W'  -0.8490   6.8722 
 'International Tables Vol C Tables 4.2.6.8 and 6.1.1.4' 
 
_symmetry_cell_setting            Tetragonal 
_symmetry_space_group_name_H-M    I41/amd 
 
loop_ 
 _symmetry_equiv_pos_as_xyz 
 'x, y, z' 
 '-y+1/4, x+3/4, z+1/4' 
 '-x, -y+1/2, z' 
 'y+1/4, -x+1/4, z+3/4' 
 'x, -y, -z' 
 '-x, y+1/2, -z' 
 'y+1/4, x+3/4, -z+1/4' 
 '-y+1/4, -x+1/4, -z+3/4' 
 'x+1/2, y+1/2, z+1/2' 
 '-y+3/4, x+5/4, z+3/4' 
 '-x+1/2, -y+1, z+1/2' 
 'y+3/4, -x+3/4, z+5/4' 
 'x+1/2, -y+1/2, -z+1/2' 
 '-x+1/2, y+1, -z+1/2' 
 'y+3/4, x+5/4, -z+3/4' 
 '-y+3/4, -x+3/4, -z+5/4' 
 '-x, -y, -z' 
 'y-1/4, -x-3/4, -z-1/4' 
 'x, y-1/2, -z' 
 '-y-1/4, x-1/4, -z-3/4' 
 '-x, y, z' 
 'x, -y-1/2, z' 
 '-y-1/4, -x-3/4, z-1/4' 
 'y-1/4, x-1/4, z-3/4' 
 '-x+1/2, -y+1/2, -z+1/2' 
 'y+1/4, -x-1/4, -z+1/4' 
 'x+1/2, y, -z+1/2' 
 '-y+1/4, x+1/4, -z-1/4' 
 '-x+1/2, y+1/2, z+1/2' 
 'x+1/2, -y, z+1/2' 
 '-y+1/4, -x-1/4, z+1/4' 
 'y+1/4, x+1/4, z-1/4' 
 
_cell_length_a                    19.4044(6) 
_cell_length_b                    19.4044(6) 
_cell_length_c                    39.924(3) 
_cell_angle_alpha                 90.00 
_cell_angle_beta                  90.00 
_cell_angle_gamma                 90.00 
_cell_volume                      15032.5(13) 
_cell_formula_units_Z             4 
_cell_measurement_temperature     173(2) 
_cell_measurement_reflns_used     25 
_cell_measurement_theta_min       12 
_cell_measurement_theta_max       18
 
_exptl_crystal_description        Block
_exptl_crystal_colour             Blue
_exptl_crystal_size_max           0.20
_exptl_crystal_size_mid           0.20
_exptl_crystal_size_min           0.20  
_exptl_crystal_density_meas       ? 
_exptl_crystal_density_diffrn     1.755 
_exptl_crystal_density_method     'not measured' 
_exptl_crystal_F_000              7108 
_exptl_absorpt_coefficient_mu     9.486 
_exptl_absorpt_correction_type    Multi-Scan
_exptl_absorpt_correction_T_min   0.25
_exptl_absorpt_correction_T_max   1.00
_exptl_absorpt_process_details    'CrystalClear (Rigaku Inc., 2007)'   
 
_exptl_special_details 
; 
 ? 
; 
 
_diffrn_ambient_temperature       173(2) 
_diffrn_radiation_wavelength      0.71073 
_diffrn_radiation_type            MoK\a 
_diffrn_radiation_source          'fine-focus sealed tube' 
_diffrn_radiation_monochromator   graphite 
_diffrn_measurement_device_type   'SuperNova, Dual, Cu at zero, Atlas' 
_diffrn_measurement_method        '\w scans'
_diffrn_detector_area_resol_mean  ? 
_diffrn_standards_number          ? 
_diffrn_standards_interval_count  ? 
_diffrn_standards_interval_time   ? 
_diffrn_standards_decay_%         ? 
_diffrn_reflns_number             15056 
_diffrn_reflns_av_R_equivalents   0.0289 
_diffrn_reflns_av_sigmaI/netI     0.0240 
_diffrn_reflns_limit_h_min        -19 
_diffrn_reflns_limit_h_max        23 
_diffrn_reflns_limit_k_min        -20 
_diffrn_reflns_limit_k_max        13 
_diffrn_reflns_limit_l_min        -25 
_diffrn_reflns_limit_l_max        47 
_diffrn_reflns_theta_min          1.80 
_diffrn_reflns_theta_max          24.99 
_reflns_number_total              3520 
_reflns_number_gt                 2877 
_reflns_threshold_expression      >2sigma(I) 
 
_computing_data_collection        'CrystalClear (Rigaku Inc., 2008)' 
_computing_cell_refinement        'CrystalClear (Rigaku Inc., 2008)' 
_computing_data_reduction         'CrystalClear (Rigaku Inc., 2008)' 
_computing_structure_solution     'SHELXS-97 (Sheldrick, 1990)' 
_computing_structure_refinement   'SHELXL-97 (Sheldrick, 1997)' 
_computing_molecular_graphics     'ORTEX (P.McArdle, 1995)' 
_computing_publication_material   'SHELXL-97/2 (Sheldrick,1997)' 
 
_refine_special_details 
; 
 Refinement of F^2^ against ALL reflections.  The weighted R-factor wR and 
 goodness of fit S are based on F^2^, conventional R-factors R are based 
 on F, with F set to zero for negative F^2^. The threshold expression of 
 F^2^ > 2sigma(F^2^) is used only for calculating R-factors(gt) etc. and is 
 not relevant to the choice of reflections for refinement.  R-factors based 
 on F^2^ are statistically about twice as large as those based on F, and R- 
 factors based on ALL data will be even larger. 
; 
 
_refine_ls_structure_factor_coef  Fsqd  
_refine_ls_matrix_type            full 
_refine_ls_weighting_scheme       calc  
_refine_ls_weighting_details 
 'calc w=1/[\s^2^(Fo^2^)+(0.0816P)^2^+263.9269P] where P=(Fo^2^+2Fc^2^)/3' 
_atom_sites_solution_primary      direct 
_atom_sites_solution_secondary    difmap 
_atom_sites_solution_hydrogens    geom 
_refine_ls_hydrogen_treatment     constr 
_refine_ls_extinction_method      none 
_refine_ls_extinction_coef        ? 
_refine_ls_number_reflns          3520 
_refine_ls_number_parameters      160 
_refine_ls_number_restraints      168 
_refine_ls_R_factor_all           0.0619 
_refine_ls_R_factor_gt            0.0535 
_refine_ls_wR_factor_ref          0.1641 
_refine_ls_wR_factor_gt           0.1568 
_refine_ls_goodness_of_fit_ref    1.114 
_refine_ls_restrained_S_all       1.356 
_refine_ls_shift/su_max           0.002 
_refine_ls_shift/su_mean          0.000 
 
loop_ 
 _atom_site_label 
 _atom_site_type_symbol 
 _atom_site_fract_x 
 _atom_site_fract_y 
 _atom_site_fract_z 
 _atom_site_U_iso_or_equiv 
 _atom_site_adp_type 
 _atom_site_occupancy 
 _atom_site_symmetry_multiplicity 
 _atom_site_calc_flag 
 _atom_site_refinement_flags 
 _atom_site_disorder_assembly 
 _atom_site_disorder_group 
W1 W 0.91191(3) 0.65481(3) 0.562226(16) 0.0513(3) Uani 1 1 d U . . 
W2 W 1.0000 0.56610(4) 0.62243(2) 0.0528(3) Uani 1 2 d SU . . 
Cu1 Cu 0.5000 0.5000 0.5000 0.1235(18) Uani 1 4 d SU . . 
P1 P 1.0000 0.7500 0.6250 0.0138(12) Uani 1 8 d SU . . 
O1 O 0.8186(6) 0.5663(7) 0.4531(3) 0.090(4) Uani 1 1 d U . . 
O2 O 1.0000 0.6414(6) 0.5408(3) 0.046(3) Uani 1 2 d SU . . 
O3 O 0.8571(4) 0.6241(5) 0.5323(2) 0.056(2) Uani 1 1 d U . . 
O4 O 0.9313(4) 0.5735(4) 0.5878(2) 0.047(2) Uani 1 1 d U . . 
O5 O 1.0000 0.4783(7) 0.6294(3) 0.058(3) Uani 1 2 d SU . . 
O6 O 1.0669(4) 0.6003(4) 0.6533(2) 0.046(2) Uani 1 1 d U . . 
O7 O 0.9181(6) 0.7500 0.5505(3) 0.044(3) Uani 1 2 d SU . . 
O8 O 1.0000 0.6854(5) 0.6032(3) 0.036(2) Uani 1 2 d SU . . 
O9 O 0.5000 0.3962(14) 0.5081(7) 0.130(5) Uani 1 2 d SU . . 
O10 O 0.5000 0.5079(17) 0.5601(7) 0.162(7) Uani 1 2 d SU . . 
N1 N 0.8198(8) 0.5000 0.5000 0.067(5) Uani 1 2 d SU . . 
N2 N 0.6044(10) 0.5000 0.5000 0.097(6) Uani 1 2 d SU . . 
C1 C 0.6380(9) 0.4644(12) 0.4773(5) 0.099(6) Uani 1 1 d U . . 
H1 H 0.6130 0.4396 0.4607 0.119 Uiso 1 1 calc R . . 
C2 C 0.7084(9) 0.4624(11) 0.4772(6) 0.095(6) Uani 1 1 d U . . 
H2 H 0.7319 0.4348 0.4612 0.114 Uiso 1 1 calc R . . 
C3 C 0.7452(11) 0.5000 0.5000 0.076(6) Uani 1 2 d SU . . 
C4 C 0.8503(8) 0.5351(9) 0.4749(4) 0.073(4) Uani 1 1 d U . . 
C5 C 0.9627(8) 0.5692(9) 0.4502(4) 0.069(4) Uani 1 1 d U . . 
H5 H 0.9381 0.5932 0.4333 0.083 Uiso 1 1 calc R . . 
C6 C 0.9291(7) 0.5355(8) 0.4741(4) 0.059(4) Uani 1 1 d U . . 
C7 C 0.9630(9) 0.5000 0.5000 0.060(5) Uani 1 2 d SU . . 
 
loop_ 
 _atom_site_aniso_label 
 _atom_site_aniso_U_11 
 _atom_site_aniso_U_22 
 _atom_site_aniso_U_33 
 _atom_site_aniso_U_23 
 _atom_site_aniso_U_13 
 _atom_site_aniso_U_12 
W1 0.0290(3) 0.0521(4) 0.0729(5) -0.0106(3) -0.0014(2) -0.0020(2) 
W2 0.0407(4) 0.0331(4) 0.0845(6) -0.0091(4) 0.000 0.000 
Cu1 0.043(2) 0.151(3) 0.176(3) -0.035(3) 0.000 0.000 
P1 0.0097(17) 0.0097(17) 0.022(3) 0.000 0.000 0.000 
O1 0.053(6) 0.108(8) 0.109(7) -0.038(7) -0.010(6) 0.014(6) 
O2 0.025(5) 0.051(6) 0.062(6) -0.008(5) 0.000 0.000 
O3 0.031(4) 0.058(5) 0.078(6) -0.017(4) -0.003(4) 0.000(4) 
O4 0.032(4) 0.038(4) 0.071(5) -0.006(4) 0.002(4) 0.000(3) 
O5 0.055(7) 0.045(7) 0.075(7) -0.010(6) 0.000 0.000 
O6 0.032(4) 0.025(4) 0.079(5) -0.006(4) -0.004(4) 0.004(3) 
O7 0.027(5) 0.052(6) 0.055(6) 0.000 -0.002(5) 0.000 
O8 0.021(5) 0.033(5) 0.053(6) -0.003(5) 0.000 0.000 
O9 0.043 0.164(10) 0.184(10) -0.008(9) 0.000(10) 0.000(10) 
O10 0.146(9) 0.170(9) 0.170(9) -0.003(6) 0.000 0.000 
N1 0.030(7) 0.076(9) 0.096(10) -0.033(8) 0.000 0.000 
N2 0.048(8) 0.119(11) 0.124(11) -0.036(10) 0.000 0.000 
C1 0.045(7) 0.127(11) 0.126(10) -0.045(9) 0.003(8) -0.004(8) 
C2 0.058(8) 0.111(10) 0.117(10) -0.035(9) -0.010(8) 0.003(8) 
C3 0.045(9) 0.088(11) 0.096(11) -0.029(9) 0.000 0.000 
C4 0.051(7) 0.081(9) 0.086(8) -0.032(7) -0.012(7) 0.015(7) 
C5 0.049(7) 0.074(8) 0.085(8) -0.020(7) -0.005(7) 0.008(6) 
C6 0.036(6) 0.062(7) 0.079(8) -0.027(6) -0.012(6) 0.003(5) 
C7 0.025(7) 0.073(10) 0.082(10) -0.031(8) 0.000 0.000 
 
_geom_special_details 
; 
 All esds (except the esd in the dihedral angle between two l.s. planes) 
 are estimated using the full covariance matrix.  The cell esds are taken 
 into account individually in the estimation of esds in distances, angles 
 and torsion angles; correlations between esds in cell parameters are only 
 used when they are defined by crystal symmetry.  An approximate (isotropic) 
 treatment of cell esds is used for estimating esds involving l.s. planes. 
; 
 
loop_ 
 _geom_bond_atom_site_label_1 
 _geom_bond_atom_site_label_2 
 _geom_bond_distance 
 _geom_bond_site_symmetry_2 
 _geom_bond_publ_flag 
W1 O3 1.706(9) . ? 
W1 O6 1.904(8) 26_576 ? 
W1 O7 1.909(3) . ? 
W1 O4 1.916(8) . ? 
W1 O2 1.929(6) . ? 
W1 O8 2.439(8) . ? 
W2 O5 1.726(14) . ? 
W2 O6 1.909(8) 21_755 ? 
W2 O6 1.909(8) . ? 
W2 O4 1.927(8) . ? 
W2 O4 1.927(8) 21_755 ? 
W2 O8 2.439(11) . ? 
Cu1 N2 2.03(2) 17_666 ? 
Cu1 N2 2.03(2) . ? 
Cu1 O9 2.04(3) . ? 
Cu1 O9 2.04(3) 17_666 ? 
Cu1 O10 2.40(3) . ? 
Cu1 O10 2.40(3) 17_666 ? 
P1 O8 1.526(10) 20_757 ? 
P1 O8 1.526(10) 26_576 ? 
P1 O8 1.526(10) . ? 
P1 O8 1.526(10) 3_765 ? 
O1 C4 1.23(2) . ? 
O2 W1 1.929(6) 21_755 ? 
O6 W1 1.904(8) 20_757 ? 
O7 W1 1.909(3) 22_575 ? 
O8 W1 2.439(8) 21_755 ? 
N1 C4 1.35(2) 5_566 ? 
N1 C4 1.35(2) . ? 
N1 C3 1.45(3) . ? 
N2 C1 1.31(2) 5_566 ? 
N2 C1 1.31(2) . ? 
C1 C2 1.37(2) . ? 
C2 C3 1.37(2) . ? 
C3 C2 1.37(2) 5_566 ? 
C4 C6 1.53(2) . ? 
C5 C6 1.33(2) . ? 
C5 C5 1.45(3) 21_755 ? 
C6 C7 1.407(17) . ? 
C7 C6 1.407(17) 5_566 ? 
C7 C7 1.43(3) 17_766 ? 
 
loop_ 
 _geom_angle_atom_site_label_1 
 _geom_angle_atom_site_label_2 
 _geom_angle_atom_site_label_3 
 _geom_angle 
 _geom_angle_site_symmetry_1 
 _geom_angle_site_symmetry_3 
 _geom_angle_publ_flag 
O3 W1 O6 102.5(4) . 26_576 ? 
O3 W1 O7 101.9(5) . . ? 
O6 W1 O7 86.4(4) 26_576 . ? 
O3 W1 O4 102.0(4) . . ? 
O6 W1 O4 88.6(4) 26_576 . ? 
O7 W1 O4 156.1(4) . . ? 
O3 W1 O2 101.2(4) . . ? 
O6 W1 O2 156.3(4) 26_576 . ? 
O7 W1 O2 88.1(5) . . ? 
O4 W1 O2 87.3(5) . . ? 
O3 W1 O8 172.3(4) . . ? 
O6 W1 O8 83.4(3) 26_576 . ? 
O7 W1 O8 83.4(4) . . ? 
O4 W1 O8 72.9(3) . . ? 
O2 W1 O8 73.1(4) . . ? 
O5 W2 O6 103.9(4) . 21_755 ? 
O5 W2 O6 103.9(4) . . ? 
O6 W2 O6 85.7(5) 21_755 . ? 
O5 W2 O4 100.9(4) . . ? 
O6 W2 O4 88.1(4) 21_755 . ? 
O6 W2 O4 155.2(3) . . ? 
O5 W2 O4 100.9(4) . 21_755 ? 
O6 W2 O4 155.2(3) 21_755 21_755 ? 
O6 W2 O4 88.1(4) . 21_755 ? 
O4 W2 O4 87.6(5) . 21_755 ? 
O5 W2 O8 170.9(5) . . ? 
O6 W2 O8 82.7(3) 21_755 . ? 
O6 W2 O8 82.7(3) . . ? 
O4 W2 O8 72.7(3) . . ? 
O4 W2 O8 72.7(3) 21_755 . ? 
N2 Cu1 N2 180.000(2) 17_666 . ? 
N2 Cu1 O9 90.000(8) 17_666 . ? 
N2 Cu1 O9 90.000(2) . . ? 
N2 Cu1 O9 90.000(3) 17_666 17_666 ? 
N2 Cu1 O9 90.000(7) . 17_666 ? 
O9 Cu1 O9 180.0(15) . 17_666 ? 
N2 Cu1 O10 90.000(4) 17_666 . ? 
N2 Cu1 O10 90.000(5) . . ? 
O9 Cu1 O10 84.6(11) . . ? 
O9 Cu1 O10 95.4(11) 17_666 . ? 
N2 Cu1 O10 90.000(5) 17_666 17_666 ? 
N2 Cu1 O10 90.000(4) . 17_666 ? 
O9 Cu1 O10 95.4(11) . 17_666 ? 
O9 Cu1 O10 84.6(11) 17_666 17_666 ? 
O10 Cu1 O10 180.000(3) . 17_666 ? 
O8 P1 O8 110.4(8) 20_757 26_576 ? 
O8 P1 O8 109.0(4) 20_757 . ? 
O8 P1 O8 109.0(4) 26_576 . ? 
O8 P1 O8 109.0(4) 20_757 3_765 ? 
O8 P1 O8 109.0(4) 26_576 3_765 ? 
O8 P1 O8 110.4(8) . 3_765 ? 
W1 O2 W1 124.7(6) 21_755 . ? 
W1 O4 W2 125.4(4) . . ? 
W1 O6 W2 151.8(4) 20_757 . ? 
W1 O7 W1 150.8(7) 22_575 . ? 
P1 O8 W2 126.9(6) . . ? 
P1 O8 W1 125.6(3) . . ? 
W2 O8 W1 88.9(3) . . ? 
P1 O8 W1 125.6(3) . 21_755 ? 
W2 O8 W1 88.9(3) . 21_755 ? 
W1 O8 W1 89.0(4) . 21_755 ? 
C4 N1 C4 128.0(19) 5_566 . ? 
C4 N1 C3 116.0(9) 5_566 . ? 
C4 N1 C3 116.0(9) . . ? 
C1 N2 C1 120(2) 5_566 . ? 
C1 N2 Cu1 119.8(11) 5_566 . ? 
C1 N2 Cu1 119.8(11) . . ? 
N2 C1 C2 120.9(19) . . ? 
C1 C2 C3 120.3(19) . . ? 
C2 C3 C2 117(2) 5_566 . ? 
C2 C3 N1 121.5(11) 5_566 . ? 
C2 C3 N1 121.5(11) . . ? 
O1 C4 N1 123.9(15) . . ? 
O1 C4 C6 119.0(17) . . ? 
N1 C4 C6 117.1(16) . . ? 
C6 C5 C5 119.4(9) . 21_755 ? 
C5 C6 C7 122.7(14) . . ? 
C5 C6 C4 120.6(15) . . ? 
C7 C6 C4 116.7(15) . . ? 
C6 C7 C6 124.3(17) 5_566 . ? 
C6 C7 C7 117.9(9) 5_566 17_766 ? 
C6 C7 C7 117.9(9) . 17_766 ? 
 
_diffrn_measured_fraction_theta_max    0.996 
_diffrn_reflns_theta_full              24.99 
_diffrn_measured_fraction_theta_full   0.996 
_refine_diff_density_max    3.133 
_refine_diff_density_min   -3.133 
_refine_diff_density_rms    0.193 

loop_
  _platon_squeeze_void_nr
  _platon_squeeze_void_average_x
  _platon_squeeze_void_average_y
  _platon_squeeze_void_average_z
  _platon_squeeze_void_volume
  _platon_squeeze_void_count_electrons
  _platon_squeeze_void_content
   1 -0.044  0.243 -0.004      8722      2357 ' '
